# Supplementary material for: A BET Bromodomain Inhibitor Suppresses Adiposity-Associated Malignant Transformation
Source: Oxford University Press journal article supplement (doi:10.1158/1940-6207.capr-17-0262), 2017-12-15
Supplement: 19406207capr170262-sup-188032_2_supp_4393976_gzgqjs.doc [file 19406207capr170262-sup-188032_2_supp_4393976_gzgqjs.doc]

**Supplemental figure 1. NF-B p65 staining in JB6 P+ cells following HuFTF treatment.** JB6 P+ cells were treated with HuFTF (200 µg/ml) for 8 h. HuFTF failed to induce nuclear localization of p65. p65 expression was examined by immunofluorescence and confocal microscopy. Photographs were taken at 40X magnification.

**Supplemental figure 2. Western Blot quantitation.** Data are presented as fold induction over the untreated control (Cont.) and normalized to actin expression. Band intensity was quantified using ‘ImageJ’ software. *p<0.001 Cont. vs MFTF treatment; ap<0.001 MFTF 150 µg/ml vs. MFTF 150 µg/ml+I-BET (1µm); bp<0.001 MFTF 300 µg/ml vs. MFTF 300 µg/ml+I-BET (1 µm).

**Supplemental figure 3. PCNA quantitation.** PCNA staining showed that the number of proliferating cells was significantly reduced with I-BET. Pictures of 6 areas were taken from three separate tumors per group. Positive cells were counted in a blinded fashion.
